# Supplementary material for: Dynamics of the Gene Regulatory Network of HIV-1 and the Role of Viral Non-coding RNAs on Latency Reversion
Source: Front Physiol. 2018 Sep 28;9:1364. doi: 10.3389/fphys.2018.01364 (PMC6172855; doi:10.3389/fphys.2018.01364)
Supplement: Supplementary file 2 [file Table_2.DOCX]

**Supplementary Table 3. Bifurcation parameters of the ODEs model**

| **Molecule** | **Parameter** | **Reduction (3x)** | **Increase (3x)** | **Biological condition*** |
| --- | --- | --- | --- | --- |
| NF-κB | *k*0  *k*1  *k*2  *k3*  *k4*  *k-1* | Saddle node  **Stable node**  Saddle node  Saddle node  Saddle node  Saddle node | Saddle node  Saddle node  Saddle node  Saddle node  Saddle node  Saddle node | -  Reduction of NF-κB  -  -  -  - |
| HATs | *k5*  *k6*  *k7*  *k-5* | Saddle node  Saddle node  Saddle node  Saddle node | Saddle node  Saddle node  Saddle node  Saddle node | -  -  -  - |
| HMTs | *k8*  *k9*  *k-8* | Saddle node  Saddle node  Saddle node | Saddle node  Saddle node  Saddle node | -  -  - |
| p5’LTR | *kb*  *kac*  *kTAR*  *kd*  *kmt* | **Stable node**  Saddle node  Saddle node  Saddle node  Saddle node | Saddle node  Saddle node  Saddle node  Saddle node  Saddle node | Inhibition of p5’LTR activity  -  -  -  - |
| p3’LTR | *kb*  *kac*  *kd*  *kmt* | Saddle node  Saddle node  Saddle node  Saddle node | Saddle node  Saddle node  Saddle node  Saddle node | -  -  -  - |
| RNA9kb(N) | *a1*  *s1*  *τ*  *kREE*  *δ1* | Saddle node  Saddle node  Saddle node  Saddle node  Saddle node | Saddle node  Saddle node  Saddle node  Saddle node  Saddle node | -  -  -  -  - |
| vsiRNA | *a2*  *δ2*  *r1* | Saddle node  Saddle node  Saddle node | Saddle node  Saddle node  Saddle node | -  -  - |
| vsaRNA | *a3*  *δ3* | Saddle node  Saddle node | Saddle node  Saddle node | -  - |
| RNA4kb(N) | *s1*  *s2*  *τ*  *kREE*  *δ5* | **Stable node**  Saddle node  Saddle node  Saddle node  Saddle node | Saddle node  **Stable node**  **Stable node**  **Stable node**  **Stable node** | Decreases RNA4kb(N)  Decreases RNA4kb(N)  Decreases RNA4kb(N)  Decreases RNA4kb(N)  Decreases RNA4kb(N) |
| RNA2kb(N) | *s2*  *kexp*  *δ6* | **Stable node**  Saddle node  Saddle node | Saddle node  **Stable node**  **Stable node** | Decreases RNA2kb(N)  Decreases RNA2kb(N)  Decreases RNA2kb(N) |
| RNA2kb(C) | *kexp*  *r3*  *δ7* | **Stable node**  Saddle node  Saddle node | Saddle node  **Stable node**  Saddle node | Decreases RNA2kb(C)  Decreases RNA2kb(C)  - |
| RNA4kb(C) | *Τ*  *kREE*  *δ8*  *r3* | Saddle node  Saddle node  Saddle node  Saddle node | Saddle node  Saddle node  Saddle node  Saddle node | -  -  -  - |
| RNA9kb(C) | *Τ*  *kREE*  *δ9*  *r3* | Saddle node  Saddle node  Saddle node  Saddle node | Saddle node  Saddle node  Saddle node  Saddle node | -  -  -  - |
| asRNA | *a4*  *r2*  *δ4* | Saddle node  Saddle node  Saddle node | Saddle node  Saddle node  Saddle node | -  -  - |
| Tat | *a5*  *a6*  *δ10* | Saddle node  Saddle node  Saddle node | Saddle node  Saddle node  Saddle node | -  -  - |
| Rev | *a7*  *δ11* | Saddle node  Saddle node | Saddle node  Saddle node | -  - |
| Nef | *a8*  *δ12* | Saddle node  Saddle node | Saddle node  Saddle node | -  - |
| Vpr | *a9*  *a10*  *δ13* | Saddle node  Saddle node  Saddle node | Saddle node  Saddle node  Saddle node | -  -  - |

*These natural situations may change latency stability
